# Supplementary material
Source: PubMed Central journal article supplement (PMC9526983)
Supplement: 12931_2022_2189_MOESM1_ESM.pdf [file 12931_2022_2189_MOESM1_ESM.pdf]

1 **Online Data Supplement**

2 **Inhaled mosliciguat (BAY 1237592): Targeting pulmonary vasculature via Apo-**  
3 **soluble guanylate cyclase**

4 Eva M. Becker-Pelster | Michael G. Hahn | Martina Delbeck | Lisa Dietz | Jörg Hüser |

5 Johannes Kopf | Thomas Kraemer | Tobias Marquardt | Thomas Mondritzki |

6 Johannes Nagelschmitz | Sylvia M. Nikkho | Philippe V. Pires | Hanna Tinel | Gerrit

7 Weimann | Frank Wunder | Peter Sandner | Joachim Schuhmacher | Johannes-Peter

8 Stasch | Hubert K.F. Truebel

9

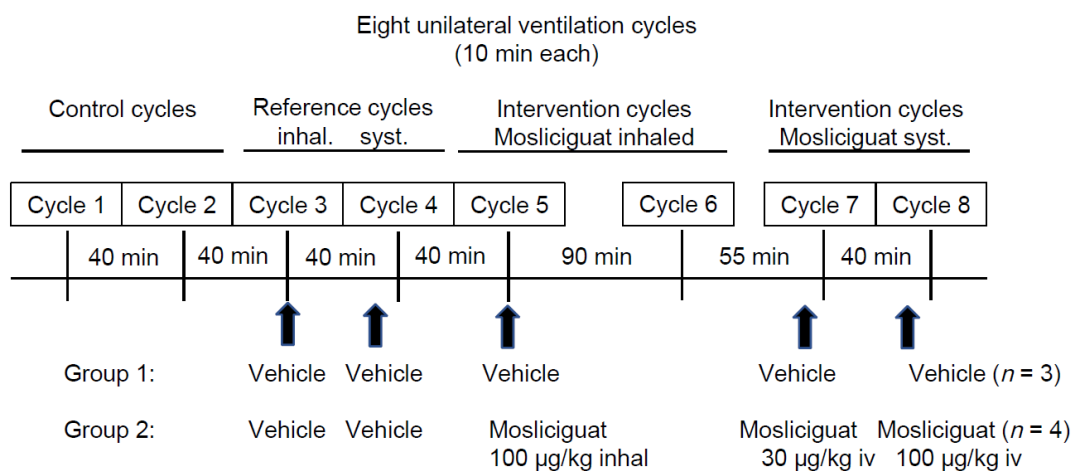

10

11

12 **Fig. S1** Treatment scheme of inhaled and systemic administered mosliciguat

13 and of vehicle treatment in the minipig model. Each animal underwent eight unilateral

14 ventilation cycles and animals were divided into two groups.
